# Supplementary material
Source: Springer Nature journal article supplement (https://www.springermedizin.de/resource/supplementary/13256_2010_1865_MOESM2_ESM.pdf/9648606)

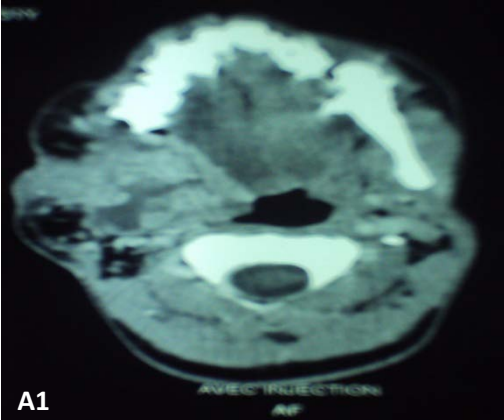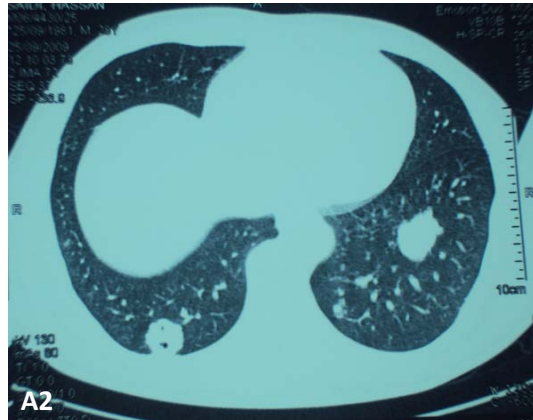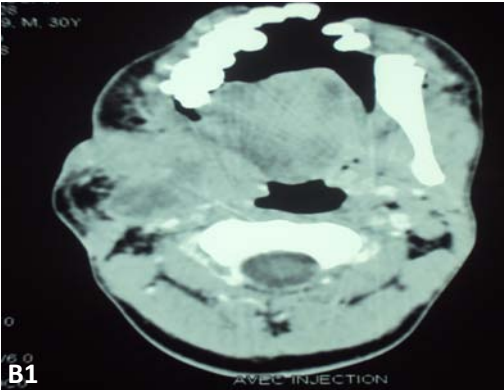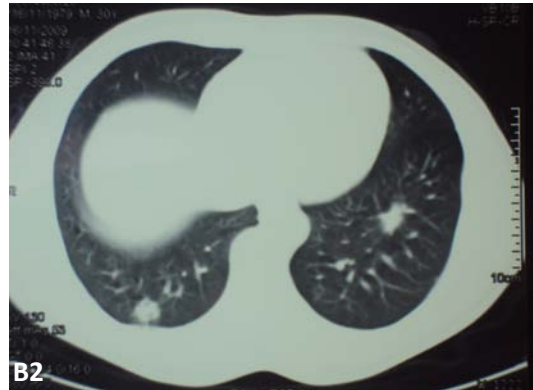

Supplement: MOESM2 [file 9648606]
